# Supplementary material for: The identification of a TNBC liver metastasis gene signature by sequential CTC‐xenograft modeling
Source: PubMed Central journal article supplement (PMC6717757; doi:10.1002/1878-0261.12533), 2019-06-19
Supplement: MOL2-13-1913-s001.pdf [file MOL2-13-1913-s001.pdf]

# **The identification of a TNBC liver metastasis gene signature by sequential CTC-xenograft modelling**

Monika Vishnoi<sup>1</sup>, Haowen Liu<sup>1</sup>, Wei Yin<sup>1</sup>, Debasish Boral<sup>1</sup>, Antonio T. Scamardo<sup>2</sup>, David Hong<sup>2</sup>, and Dario Marchetti<sup>1\*</sup>

<sup>1</sup>Biomarker Research Program Center, Houston Methodist Research Institute, Houston, TX.

<sup>2</sup>Department of Investigational Cancer Therapeutics, The University of Texas MD Anderson Cancer Center, Houston, 77030 TX, USA.

\*Correspondence and requests for materials should be addressed to Dario Marchetti. 6670 Bertner Avenue, Houston, TX. Phone: 713-363-7769; Fax: 713-363-7717; E-Mail: [dmarchetti@houstonmethodist.org](mailto:dmarchetti@houstonmethodist.org)

Supplementary Table S1: Clinical parameters of TNBC patients used in this study

| Patient ID | Primary cancer | Metastatic site              | Her-2 | ER/PR    | PIK3CA & BRCA1/2 mutation | Stage at diagnosis | Ki67 Results  |
|------------|----------------|------------------------------|-------|----------|---------------------------|--------------------|---------------|
| Pt 1       | Breast         | Lung and node                | Neg   | Neg/ Neg | Wild type                 | T2N3b              | Positive      |
| Pt 2       | Breast         | Bones, nodes, lung and liver | Neg   | Neg/Neg  | Wild type                 | 4                  | Positive      |
| Pt 3       | Breast         | Node, lung and bone          | Neg   | Neg/Neg  | Wild type                 | 4                  | Not available |

Supplementary figure S1 (a)

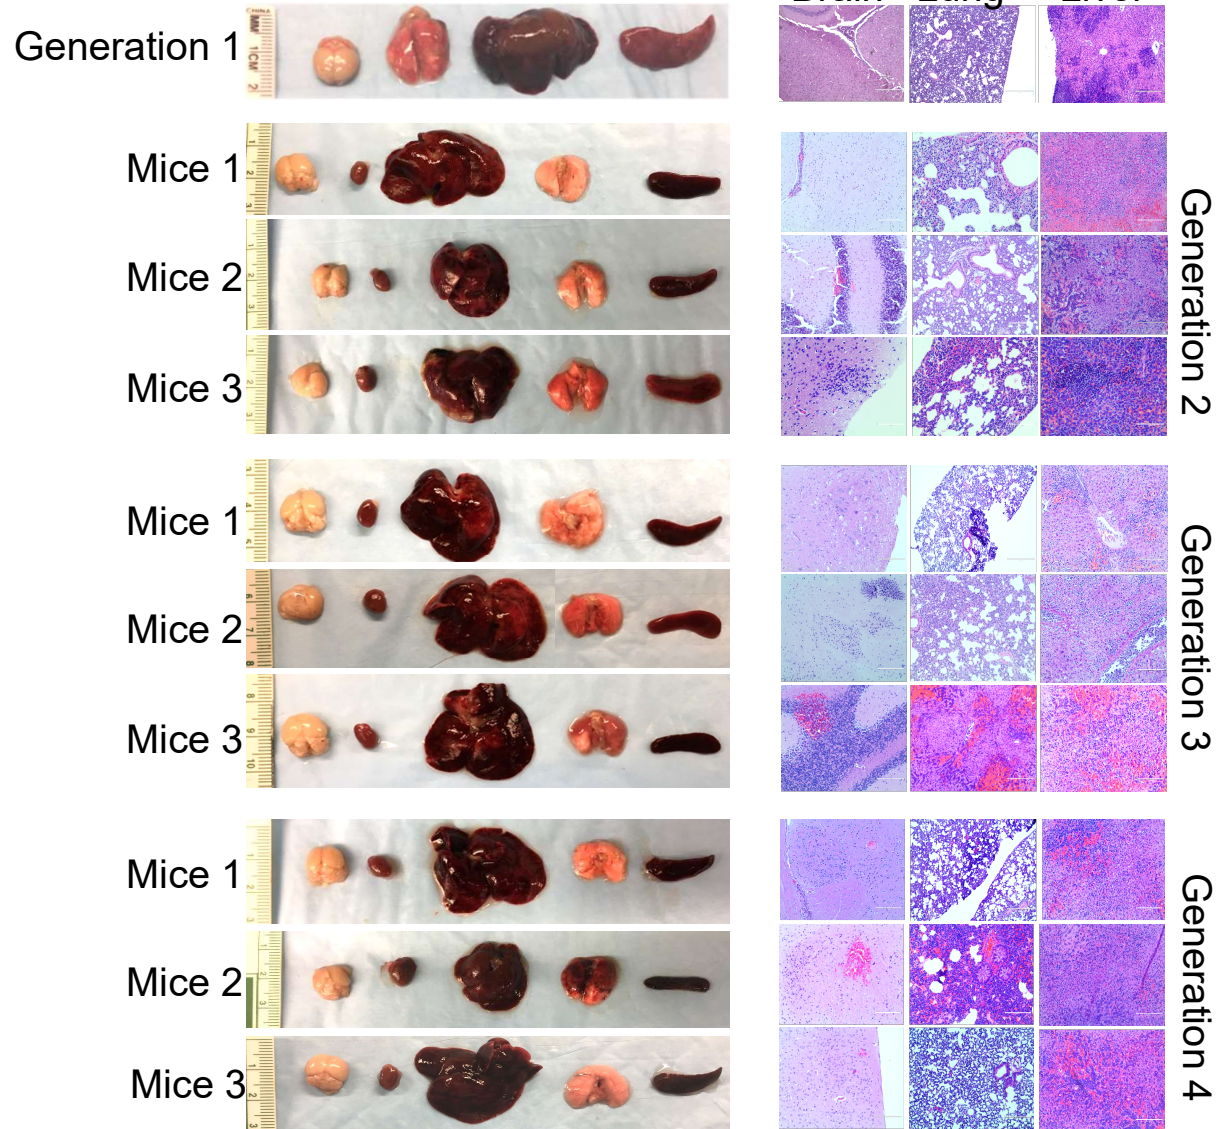

Supplementary figure S1a: Left panel showing macroscopic liver metastasis vs other organs (brain, heart, lung and spleen) and right panel showing H&E staining of brain, lung and liver derived from liver metastatic TNBC CDX mouse for each successive generations.

Supplementary figure S1 (b)

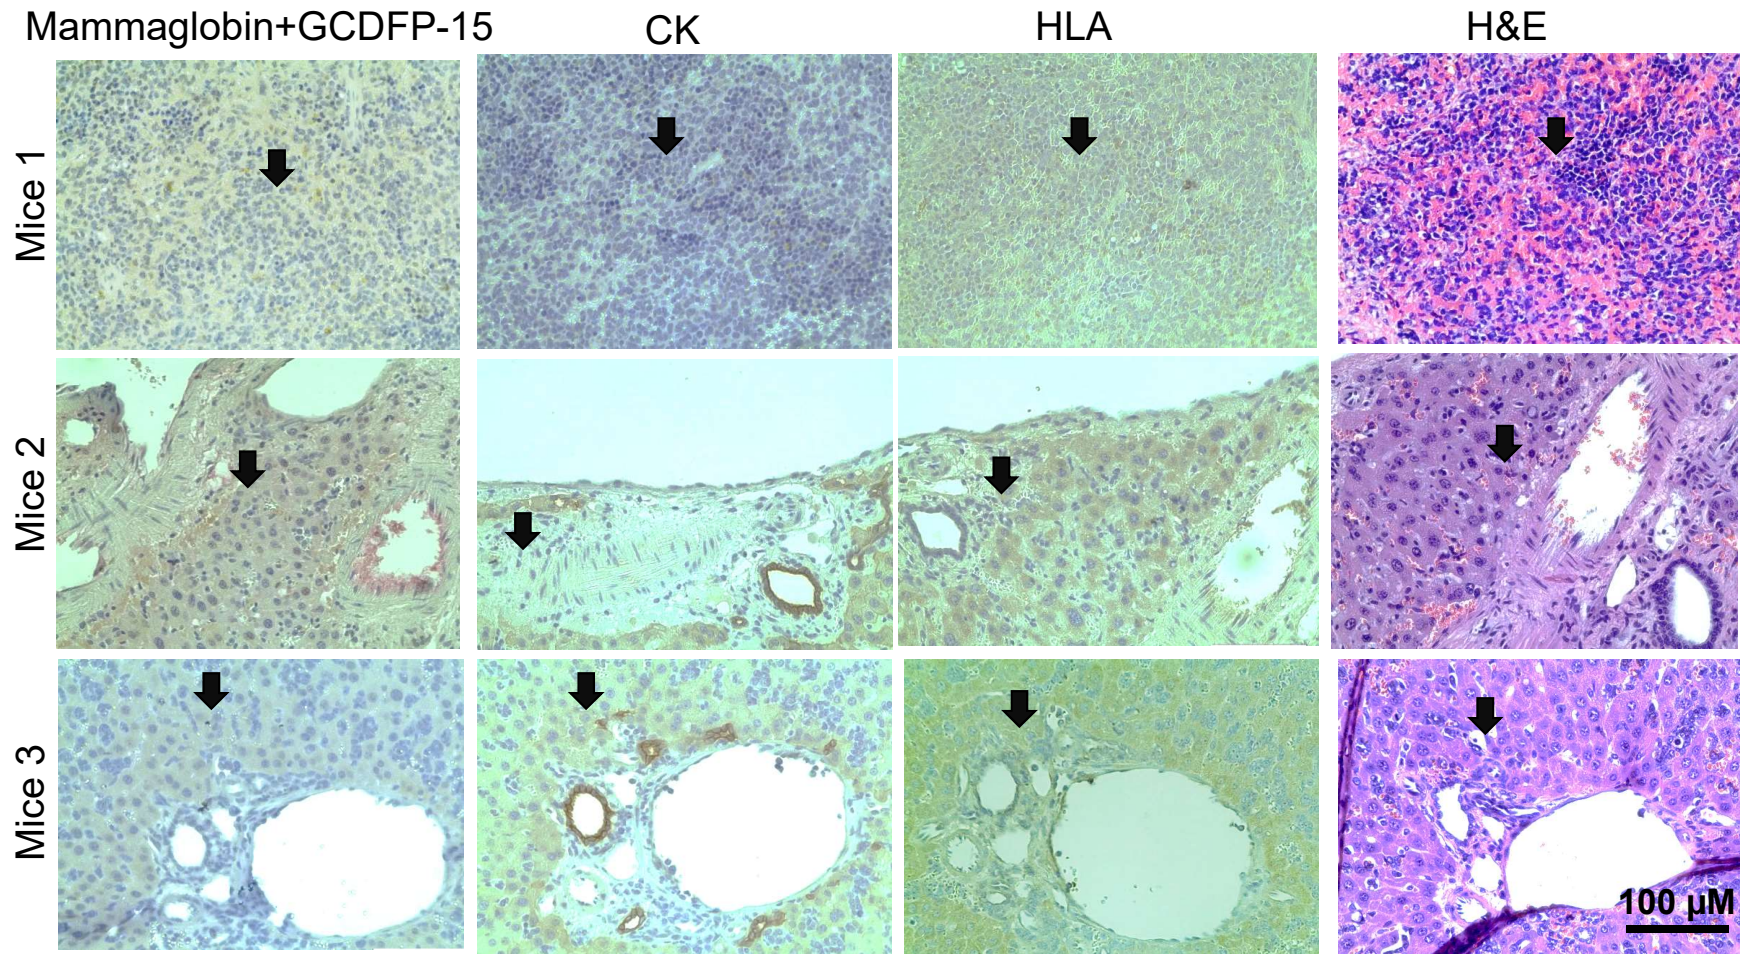

(b) Histopathological evaluation showing staining of human (HLA-ABC), epithelial tumor (Pan-CK) and breast origin (mammaglobin+GCDFP15) markers in CDX-derived liver tissue of fourth generation. Left panel showing anti-GCDFP-15+ anti-mammaglobin (brown color) and anti-GCDFP-15 only (red color) markers staining

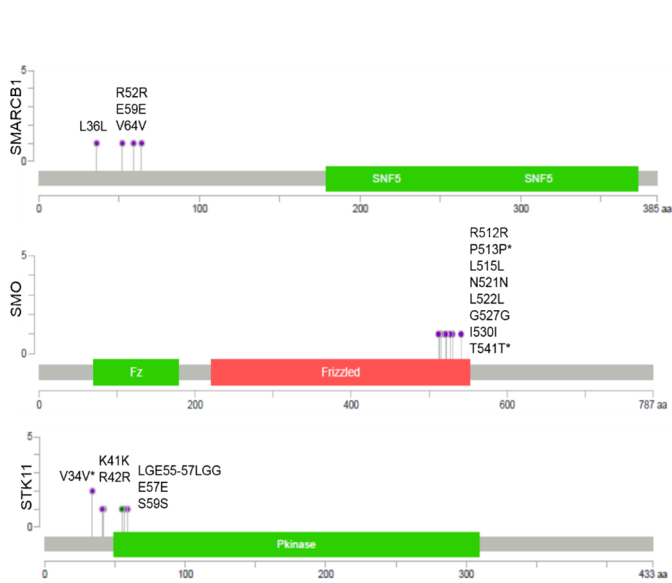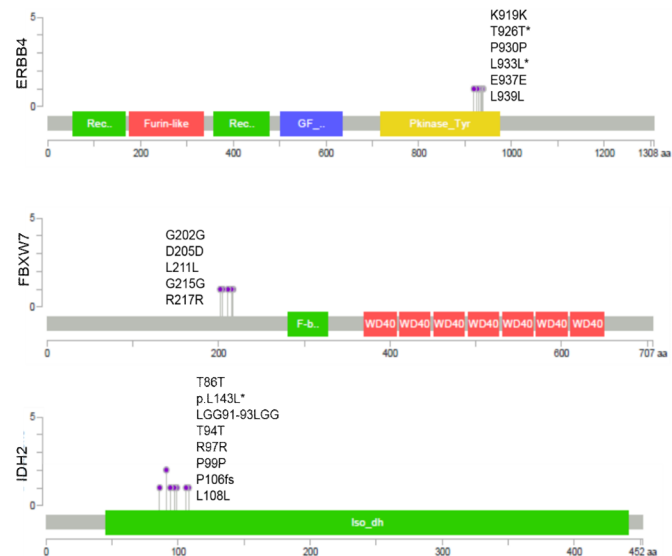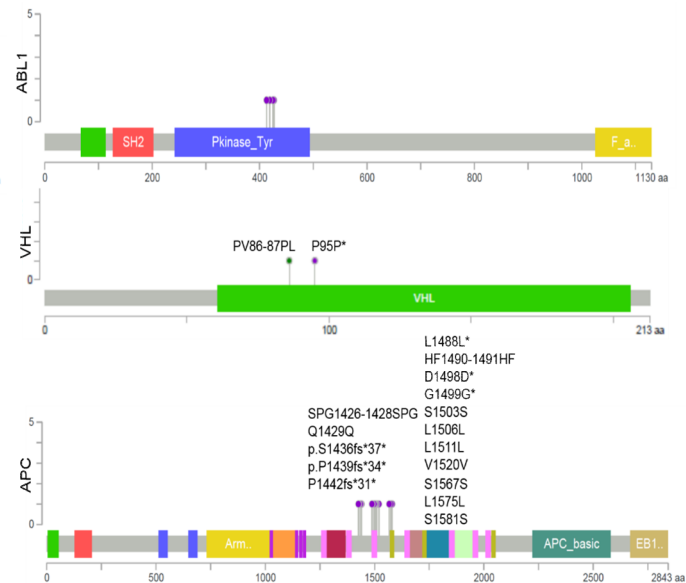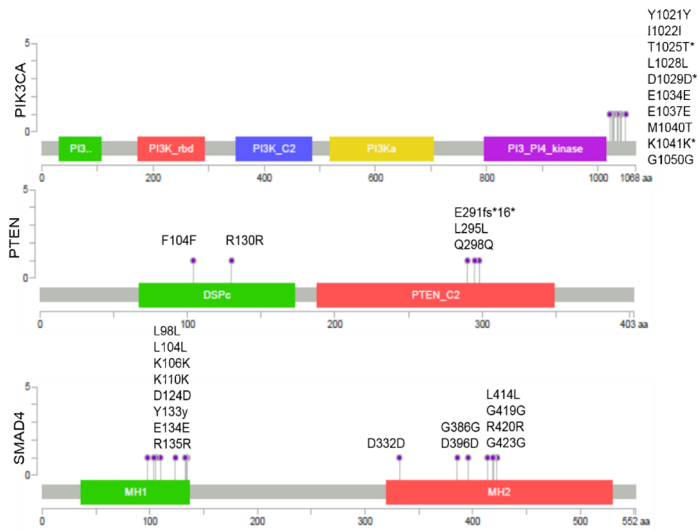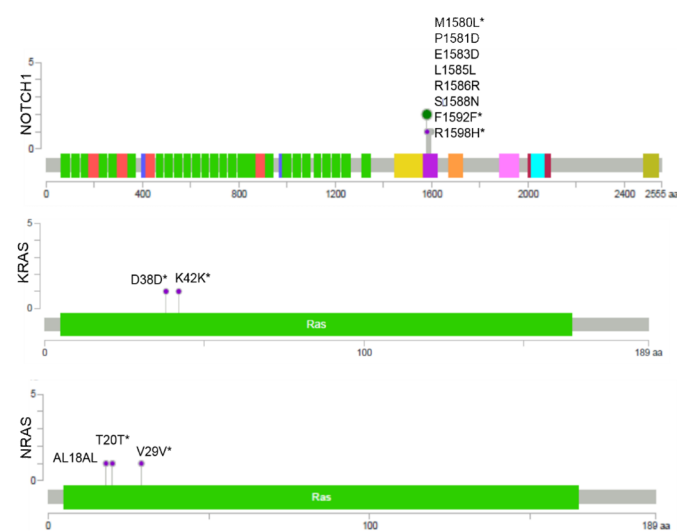

Supplementary figure S2: Identical genomic mutational pattern of CDX model (1-4 generations) derived from sequencing of 50 cancer genes through AmpliSeq Ion Torrent Sequencing panel. Respective gene map showing location and type of mutation present on gene. Green and purple color represents missense and other mutations respectively. Asterisk represents cosmic mutations present in respective gene ([http://www.cbioportal.org/mutation\\_mapper.jsp](http://www.cbioportal.org/mutation_mapper.jsp))

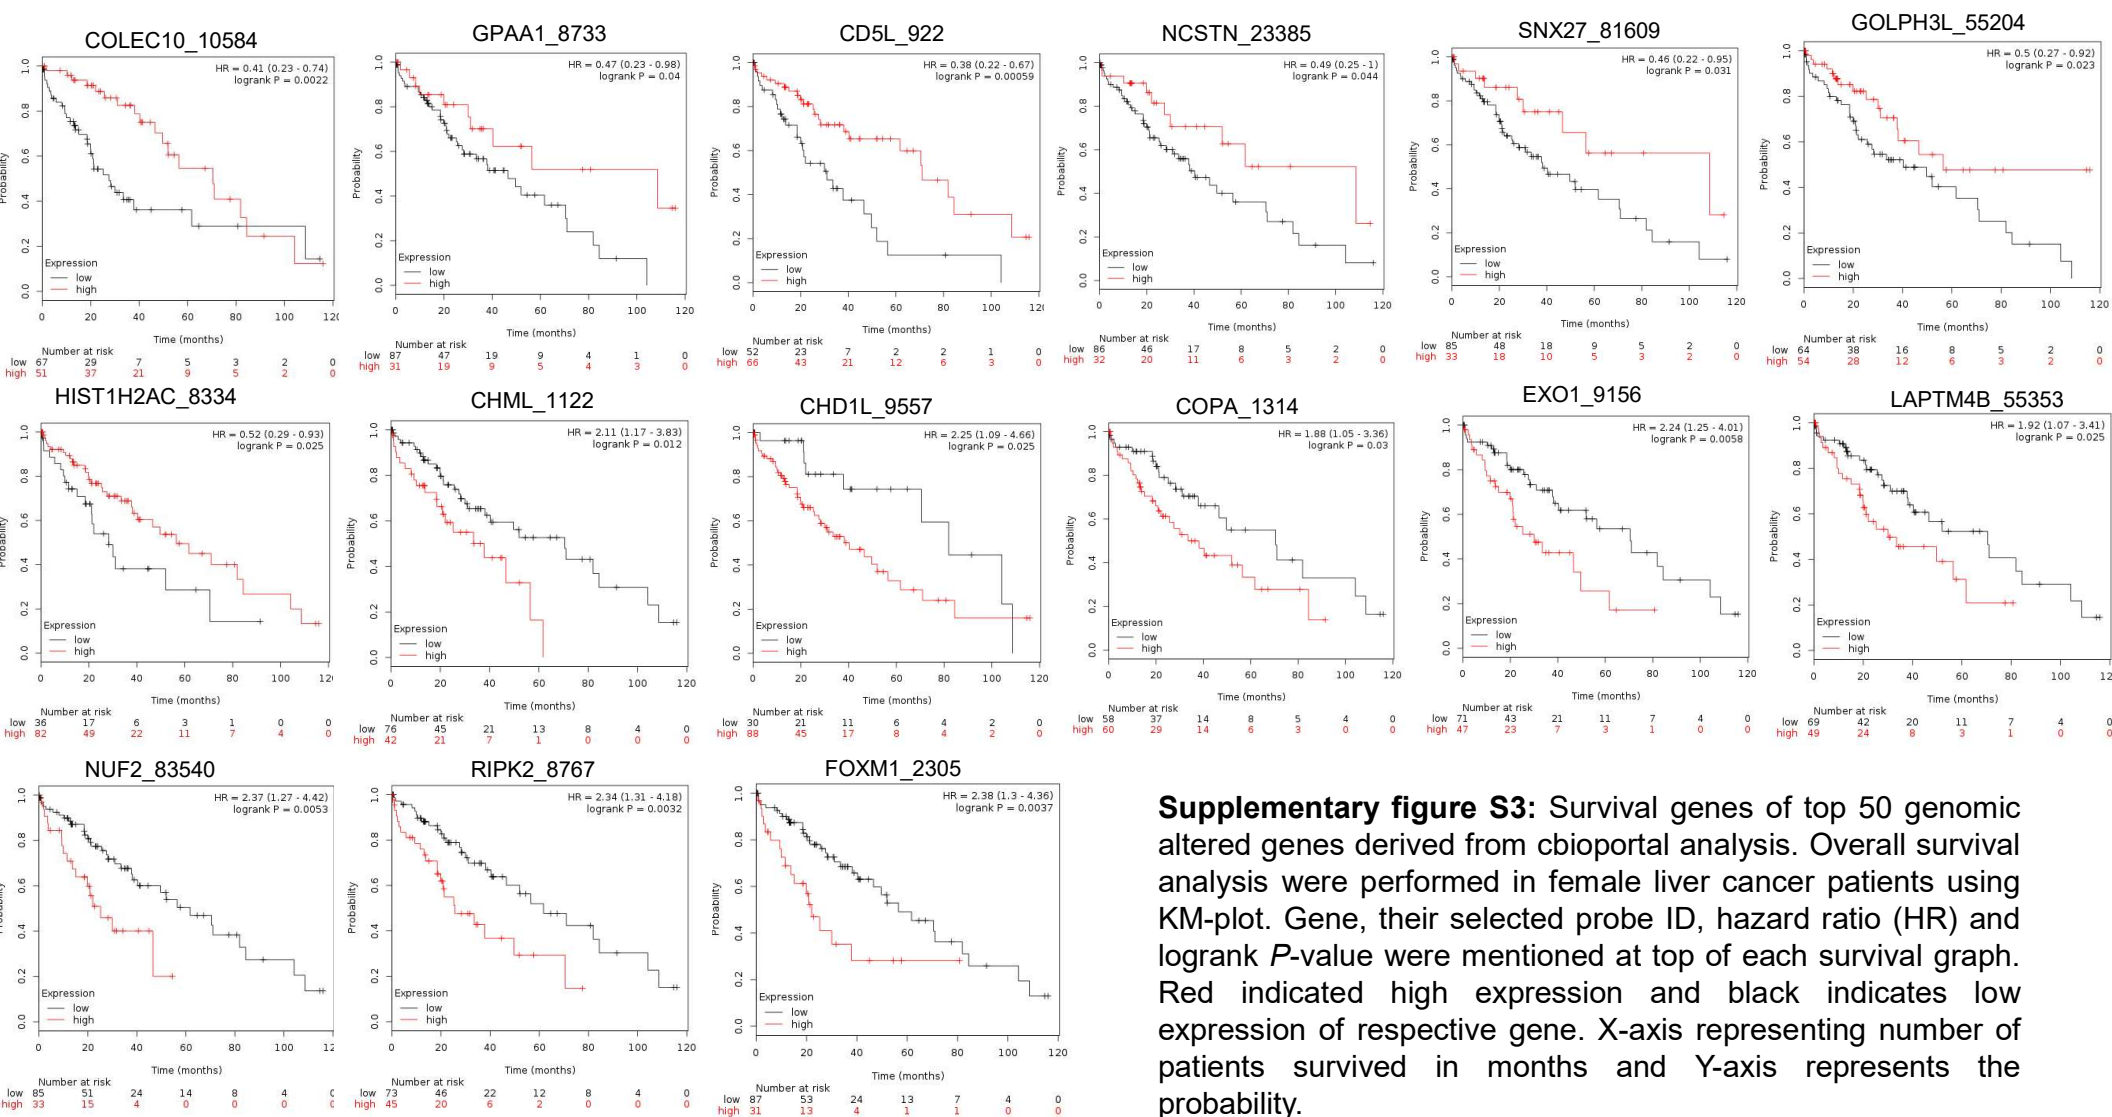

**Supplementary figure S3:** Survival genes of top 50 genomic altered genes derived from cbioportal analysis. Overall survival analysis were performed in female liver cancer patients using KM-plot. Gene, their selected probe ID, hazard ratio (HR) and logrank *P*-value were mentioned at top of each survival graph. Red indicated high expression and black indicates low expression of respective gene. X-axis representing number of patients survived in months and Y-axis represents the probability.

**Supplementary Table S2:** Twenty-four gene pairs with significant 502 co-occurrent alterations

| <b>Gene A</b> | <b>Gene B</b> | <b>Neither</b> | <b>A<br/>Not<br/>B</b> | <b>B<br/>Not<br/>A</b> | <b>Both</b> | <b>Log<br/>Odds<br/>Ratio</b> | <b>p-Value</b> | <b>Adjusted<br/>p-Value</b> | <b>Tendency</b> |
|---------------|---------------|----------------|------------------------|------------------------|-------------|-------------------------------|----------------|-----------------------------|-----------------|
| SQLE          | WASHC5        | 176            | 0                      | 0                      | 80          | >3                            | <0.001         | <0.001                      | Co-occurrence   |
| ATAD2         | SQLE          | 173            | 3                      | 3                      | 77          | >3                            | <0.001         | <0.001                      | Co-occurrence   |
| ATAD2         | WASHC5        | 173            | 3                      | 3                      | 77          | >3                            | <0.001         | <0.001                      | Co-occurrence   |
| GBA           | GBAP1         | 211            | 0                      | 0                      | 45          | >3                            | <0.001         | <0.001                      | Co-occurrence   |
| ATP6V1C1      | YWHAZ         | 183            | 4                      | 4                      | 65          | >3                            | <0.001         | <0.001                      | Co-occurrence   |
| COPA          | NCSTN         | 212            | 0                      | 0                      | 44          | >3                            | <0.001         | <0.001                      | Co-occurrence   |
| CCT3          | SSR2          | 212            | 0                      | 0                      | 44          | >3                            | <0.001         | <0.001                      | Co-occurrence   |
| NUF2          | RGS5          | 214            | 0                      | 0                      | 42          | >3                            | <0.001         | <0.001                      | Co-occurrence   |
| PIP5K1A       | PRUNE1        | 214            | 0                      | 0                      | 42          | >3                            | <0.001         | <0.001                      | Co-occurrence   |
| CCT3          | GBA           | 211            | 0                      | 1                      | 44          | >3                            | <0.001         | <0.001                      | Co-occurrence   |
| CCT3          | GBAP1         | 211            | 0                      | 1                      | 44          | >3                            | <0.001         | <0.001                      | Co-occurrence   |
| COPA          | PEA15         | 211            | 0                      | 1                      | 44          | >3                            | <0.001         | <0.001                      | Co-occurrence   |
| PEA15         | NCSTN         | 211            | 1                      | 0                      | 44          | >3                            | <0.001         | <0.001                      | Co-occurrence   |
| GBA           | SSR2          | 211            | 1                      | 0                      | 44          | >3                            | <0.001         | <0.001                      | Co-occurrence   |
| GBAP1         | SSR2          | 211            | 1                      | 0                      | 44          | >3                            | <0.001         | <0.001                      | Co-occurrence   |
| ILF2          | UBAP2L        | 208            | 2                      | 0                      | 46          | >3                            | <0.001         | <0.001                      | Co-occurrence   |
| HIST2H2AC     | HIST2H2BE     | 215            | 0                      | 0                      | 41          | >3                            | <0.001         | <0.001                      | Co-occurrence   |
| HIST2H2AC     | HIST2H4B      | 215            | 0                      | 0                      | 41          | >3                            | <0.001         | <0.001                      | Co-occurrence   |
| HIST2H2BE     | HIST2H4B      | 215            | 0                      | 0                      | 41          | >3                            | <0.001         | <0.001                      | Co-occurrence   |
| COLEC10       | ATAD2         | 166            | 10                     | 4                      | 76          | >3                            | <0.001         | <0.001                      | Co-occurrence   |
| HIST2H2AA3    | HIST2H2BC     | 216            | 0                      | 0                      | 40          | >3                            | <0.001         | <0.001                      | Co-occurrence   |
| HIST2H2AA3    | HIST2H2AA4    | 216            | 0                      | 0                      | 40          | >3                            | <0.001         | <0.001                      | Co-occurrence   |
| HIST2H2BC     | HIST2H2AA4    | 216            | 0                      | 0                      | 40          | >3                            | <0.001         | <0.001                      | Co-occurrence   |
| GOLPH3L       | PIP5K1A       | 213            | 1                      | 0                      | 42          | >3                            | <0.001         | <0.001                      | Co-occurrence   |
| GOLPH3L       | PRUNE1        | 213            | 1                      | 0                      | 42          | >3                            | <0.001         | <0.001                      | Co-occurrence   |
| PEA15         | TAGLN2        | 210            | 1                      | 1                      | 44          | >3                            | <0.001         | <0.001                      | Co-occurrence   |
| HIST2H2AC     | HIST2H2AA3    | 215            | 1                      | 0                      | 40          | >3                            | <0.001         | <0.001                      | Co-occurrence   |
| HIST2H2BE     | HIST2H2AA3    | 215            | 1                      | 0                      | 40          | >3                            | <0.001         | <0.001                      | Co-occurrence   |
| HIST2H4B      | HIST2H2AA3    | 215            | 1                      | 0                      | 40          | >3                            | <0.001         | <0.001                      | Co-occurrence   |
| HIST2H2AC     | HIST2H2BC     | 215            | 1                      | 0                      | 40          | >3                            | <0.001         | <0.001                      | Co-occurrence   |
| HIST2H2BE     | HIST2H2BC     | 215            | 1                      | 0                      | 40          | >3                            | <0.001         | <0.001                      | Co-occurrence   |
| HIST2H4B      | HIST2H2BC     | 215            | 1                      | 0                      | 40          | >3                            | <0.001         | <0.001                      | Co-occurrence   |
| HIST2H2AC     | HIST2H2AA4    | 215            | 1                      | 0                      | 40          | >3                            | <0.001         | <0.001                      | Co-occurrence   |
| HIST2H2BE     | HIST2H2AA4    | 215            | 1                      | 0                      | 40          | >3                            | <0.001         | <0.001                      | Co-occurrence   |
| HIST2H4B      | HIST2H2AA4    | 215            | 1                      | 0                      | 40          | >3                            | <0.001         | <0.001                      | Co-occurrence   |
| GOLPH3L       | VPS45         | 212            | 1                      | 1                      | 42          | >3                            | <0.001         | <0.001                      | Co-occurrence   |
| GBA           | UBAP2L        | 209            | 1                      | 2                      | 44          | >3                            | <0.001         | <0.001                      | Co-occurrence   |
| GBAP1         | UBAP2L        | 209            | 1                      | 2                      | 44          | >3                            | <0.001         | <0.001                      | Co-occurrence   |

|           |         |     |    |   |    |    |        |        |               |
|-----------|---------|-----|----|---|----|----|--------|--------|---------------|
| GNPAT     | TTC13   | 216 | 0  | 1 | 39 | >3 | <0.001 | <0.001 | Co-occurrence |
| COPA      | TAGLN2  | 210 | 1  | 2 | 43 | >3 | <0.001 | <0.001 | Co-occurrence |
| NCSTN     | TAGLN2  | 210 | 1  | 2 | 43 | >3 | <0.001 | <0.001 | Co-occurrence |
| CCT3      | CD5L    | 211 | 2  | 1 | 42 | >3 | <0.001 | <0.001 | Co-occurrence |
| CD5L      | SSR2    | 211 | 1  | 2 | 42 | >3 | <0.001 | <0.001 | Co-occurrence |
| CCT3      | UBAP2L  | 209 | 1  | 3 | 43 | >3 | <0.001 | <0.001 | Co-occurrence |
| SSR2      | UBAP2L  | 209 | 1  | 3 | 43 | >3 | <0.001 | <0.001 | Co-occurrence |
| PIP5K1A   | VPS45   | 212 | 1  | 2 | 41 | >3 | <0.001 | <0.001 | Co-occurrence |
| PRUNE1    | VPS45   | 212 | 1  | 2 | 41 | >3 | <0.001 | <0.001 | Co-occurrence |
| COLEC10   | SQLE    | 164 | 12 | 6 | 74 | >3 | <0.001 | <0.001 | Co-occurrence |
| COLEC10   | WASHC5  | 164 | 12 | 6 | 74 | >3 | <0.001 | <0.001 | Co-occurrence |
| ILF2      | GBA     | 207 | 4  | 1 | 44 | >3 | <0.001 | <0.001 | Co-occurrence |
| ILF2      | GBAP1   | 207 | 4  | 1 | 44 | >3 | <0.001 | <0.001 | Co-occurrence |
| RBM12B    | INTS8   | 198 | 5  | 3 | 50 | >3 | <0.001 | <0.001 | Co-occurrence |
| CD5L      | GBA     | 210 | 1  | 3 | 42 | >3 | <0.001 | <0.001 | Co-occurrence |
| CD5L      | GBAP1   | 210 | 1  | 3 | 42 | >3 | <0.001 | <0.001 | Co-occurrence |
| SNX27     | PIP5K1A | 211 | 3  | 1 | 41 | >3 | <0.001 | <0.001 | Co-occurrence |
| SNX27     | PRUNE1  | 211 | 3  | 1 | 41 | >3 | <0.001 | <0.001 | Co-occurrence |
| S100A10   | SNX27   | 205 | 7  | 0 | 44 | >3 | <0.001 | <0.001 | Co-occurrence |
| CHML      | EXO1    | 223 | 0  | 0 | 33 | >3 | <0.001 | <0.001 | Co-occurrence |
| ILF2      | CCT3    | 207 | 5  | 1 | 43 | >3 | <0.001 | <0.001 | Co-occurrence |
| ILF2      | SSR2    | 207 | 5  | 1 | 43 | >3 | <0.001 | <0.001 | Co-occurrence |
| SNX27     | GOLPH3L | 210 | 3  | 2 | 41 | >3 | <0.001 | <0.001 | Co-occurrence |
| RBM12B    | RIPK2   | 196 | 5  | 5 | 50 | >3 | <0.001 | <0.001 | Co-occurrence |
| YWHAZ     | LAPTM4B | 185 | 13 | 2 | 56 | >3 | <0.001 | <0.001 | Co-occurrence |
| CD5L      | TAGLN2  | 209 | 2  | 4 | 41 | >3 | <0.001 | <0.001 | Co-occurrence |
| GNPAT     | SIPA1L2 | 215 | 2  | 2 | 37 | >3 | <0.001 | <0.001 | Co-occurrence |
| CD5L      | UBAP2L  | 208 | 2  | 5 | 41 | >3 | <0.001 | <0.001 | Co-occurrence |
| CCT3      | TAGLN2  | 208 | 3  | 4 | 41 | >3 | <0.001 | <0.001 | Co-occurrence |
| SSR2      | TAGLN2  | 208 | 3  | 4 | 41 | >3 | <0.001 | <0.001 | Co-occurrence |
| HIST2H2AC | VPS45   | 211 | 2  | 4 | 39 | >3 | <0.001 | <0.001 | Co-occurrence |
| HIST2H2BE | VPS45   | 211 | 2  | 4 | 39 | >3 | <0.001 | <0.001 | Co-occurrence |
| HIST2H4B  | VPS45   | 211 | 2  | 4 | 39 | >3 | <0.001 | <0.001 | Co-occurrence |
| ATP6V1C1  | LAPTM4B | 184 | 14 | 3 | 55 | >3 | <0.001 | <0.001 | Co-occurrence |
| SIPA1L2   | TTC13   | 214 | 2  | 3 | 37 | >3 | <0.001 | <0.001 | Co-occurrence |
| SNX27     | VPS45   | 209 | 4  | 3 | 40 | >3 | <0.001 | <0.001 | Co-occurrence |
| GBA       | TAGLN2  | 207 | 4  | 4 | 41 | >3 | <0.001 | <0.001 | Co-occurrence |
| GBAP1     | TAGLN2  | 207 | 4  | 4 | 41 | >3 | <0.001 | <0.001 | Co-occurrence |
| S100A10   | GOLPH3L | 204 | 9  | 1 | 42 | >3 | <0.001 | <0.001 | Co-occurrence |
| RIPK2     | ZNF704  | 198 | 9  | 3 | 46 | >3 | <0.001 | <0.001 | Co-occurrence |
| ILF2      | CD5L    | 206 | 7  | 2 | 41 | >3 | <0.001 | <0.001 | Co-occurrence |
| CD5L      | PEA15   | 208 | 3  | 5 | 40 | >3 | <0.001 | <0.001 | Co-occurrence |



|            |            |     |    |   |    |    |        |        |               |
|------------|------------|-----|----|---|----|----|--------|--------|---------------|
| HIST2H2AA3 | VPS45      | 211 | 2  | 5 | 38 | >3 | <0.001 | <0.001 | Co-occurrence |
| HIST2H2BC  | VPS45      | 211 | 2  | 5 | 38 | >3 | <0.001 | <0.001 | Co-occurrence |
| VPS45      | HIST2H2AA4 | 211 | 5  | 2 | 38 | >3 | <0.001 | <0.001 | Co-occurrence |
| HIST2H2AC  | PIP5K1A    | 211 | 3  | 4 | 38 | >3 | <0.001 | <0.001 | Co-occurrence |
| HIST2H2BE  | PIP5K1A    | 211 | 3  | 4 | 38 | >3 | <0.001 | <0.001 | Co-occurrence |
| HIST2H4B   | PIP5K1A    | 211 | 3  | 4 | 38 | >3 | <0.001 | <0.001 | Co-occurrence |
| HIST2H2AC  | PRUNE1     | 211 | 3  | 4 | 38 | >3 | <0.001 | <0.001 | Co-occurrence |
| HIST2H2BE  | PRUNE1     | 211 | 3  | 4 | 38 | >3 | <0.001 | <0.001 | Co-occurrence |
| HIST2H4B   | PRUNE1     | 211 | 3  | 4 | 38 | >3 | <0.001 | <0.001 | Co-occurrence |
| CHD1L      | HIST2H2AA3 | 214 | 2  | 4 | 36 | >3 | <0.001 | <0.001 | Co-occurrence |
| CHD1L      | HIST2H2BC  | 214 | 2  | 4 | 36 | >3 | <0.001 | <0.001 | Co-occurrence |
| CHD1L      | HIST2H2AA4 | 214 | 2  | 4 | 36 | >3 | <0.001 | <0.001 | Co-occurrence |
| S100A10    | PIP5K1A    | 204 | 10 | 1 | 41 | >3 | <0.001 | <0.001 | Co-occurrence |
| S100A10    | PRUNE1     | 204 | 10 | 1 | 41 | >3 | <0.001 | <0.001 | Co-occurrence |
| CCT3       | PEA15      | 207 | 4  | 5 | 40 | >3 | <0.001 | <0.001 | Co-occurrence |
| PEA15      | SSR2       | 207 | 5  | 4 | 40 | >3 | <0.001 | <0.001 | Co-occurrence |
| GOLPH3L    | HIST2H2AC  | 210 | 5  | 3 | 38 | >3 | <0.001 | <0.001 | Co-occurrence |
| GOLPH3L    | HIST2H2BE  | 210 | 5  | 3 | 38 | >3 | <0.001 | <0.001 | Co-occurrence |
| GOLPH3L    | HIST2H4B   | 210 | 5  | 3 | 38 | >3 | <0.001 | <0.001 | Co-occurrence |
| LAPTM4B    | INTS8      | 193 | 10 | 5 | 48 | >3 | <0.001 | <0.001 | Co-occurrence |
| CHD1L      | HIST2H2AC  | 213 | 2  | 5 | 36 | >3 | <0.001 | <0.001 | Co-occurrence |
| CHD1L      | HIST2H2BE  | 213 | 2  | 5 | 36 | >3 | <0.001 | <0.001 | Co-occurrence |
| CHD1L      | HIST2H4B   | 213 | 2  | 5 | 36 | >3 | <0.001 | <0.001 | Co-occurrence |
| CD5L       | COPA       | 208 | 4  | 5 | 39 | >3 | <0.001 | <0.001 | Co-occurrence |
| CD5L       | NCSTN      | 208 | 4  | 5 | 39 | >3 | <0.001 | <0.001 | Co-occurrence |
| GBA        | PEA15      | 206 | 5  | 5 | 40 | >3 | <0.001 | <0.001 | Co-occurrence |
| GBAP1      | PEA15      | 206 | 5  | 5 | 40 | >3 | <0.001 | <0.001 | Co-occurrence |
| HIST2H2AA3 | PIP5K1A    | 211 | 3  | 5 | 37 | >3 | <0.001 | <0.001 | Co-occurrence |
| HIST2H2BC  | PIP5K1A    | 211 | 3  | 5 | 37 | >3 | <0.001 | <0.001 | Co-occurrence |
| HIST2H2AA3 | PRUNE1     | 211 | 3  | 5 | 37 | >3 | <0.001 | <0.001 | Co-occurrence |
| HIST2H2BC  | PRUNE1     | 211 | 3  | 5 | 37 | >3 | <0.001 | <0.001 | Co-occurrence |
| PIP5K1A    | HIST2H2AA4 | 211 | 5  | 3 | 37 | >3 | <0.001 | <0.001 | Co-occurrence |
| PRUNE1     | HIST2H2AA4 | 211 | 5  | 3 | 37 | >3 | <0.001 | <0.001 | Co-occurrence |
| S100A10    | VPS45      | 203 | 10 | 2 | 41 | >3 | <0.001 | <0.001 | Co-occurrence |
| CCT3       | COPA       | 207 | 5  | 5 | 39 | >3 | <0.001 | <0.001 | Co-occurrence |
| CCT3       | NCSTN      | 207 | 5  | 5 | 39 | >3 | <0.001 | <0.001 | Co-occurrence |
| COPA       | SSR2       | 207 | 5  | 5 | 39 | >3 | <0.001 | <0.001 | Co-occurrence |
| NCSTN      | SSR2       | 207 | 5  | 5 | 39 | >3 | <0.001 | <0.001 | Co-occurrence |
| COLEC10    | ATP6V1C1   | 165 | 22 | 5 | 64 | >3 | <0.001 | <0.001 | Co-occurrence |
| GOLPH3L    | HIST2H2AA3 | 210 | 6  | 3 | 37 | >3 | <0.001 | <0.001 | Co-occurrence |
| GOLPH3L    | HIST2H2BC  | 210 | 6  | 3 | 37 | >3 | <0.001 | <0.001 | Co-occurrence |
| GOLPH3L    | HIST2H2AA4 | 210 | 6  | 3 | 37 | >3 | <0.001 | <0.001 | Co-occurrence |

|          |            |     |    |   |    |    |        |        |               |
|----------|------------|-----|----|---|----|----|--------|--------|---------------|
| TAGLN2   | UBAP2L     | 205 | 5  | 6 | 40 | >3 | <0.001 | <0.001 | Co-occurrence |
| LAPTM4B  | RBM12B     | 191 | 10 | 7 | 48 | >3 | <0.001 | <0.001 | Co-occurrence |
| TARBP1   | RBM34      | 214 | 7  | 1 | 34 | >3 | <0.001 | <0.001 | Co-occurrence |
| COPA     | GBA        | 206 | 5  | 6 | 39 | >3 | <0.001 | <0.001 | Co-occurrence |
| COPA     | GBAP1      | 206 | 5  | 6 | 39 | >3 | <0.001 | <0.001 | Co-occurrence |
| GBA      | NCSTN      | 206 | 6  | 5 | 39 | >3 | <0.001 | <0.001 | Co-occurrence |
| GBAP1    | NCSTN      | 206 | 6  | 5 | 39 | >3 | <0.001 | <0.001 | Co-occurrence |
| RIPK2    | INTS8      | 194 | 9  | 7 | 46 | >3 | <0.001 | <0.001 | Co-occurrence |
| PEA15    | NUF2       | 207 | 7  | 4 | 38 | >3 | <0.001 | <0.001 | Co-occurrence |
| PEA15    | RGS5       | 207 | 7  | 4 | 38 | >3 | <0.001 | <0.001 | Co-occurrence |
| NUF2     | TAGLN2     | 207 | 4  | 7 | 38 | >3 | <0.001 | <0.001 | Co-occurrence |
| RGS5     | TAGLN2     | 207 | 4  | 7 | 38 | >3 | <0.001 | <0.001 | Co-occurrence |
| ILF2     | TAGLN2     | 203 | 8  | 5 | 40 | >3 | <0.001 | <0.001 | Co-occurrence |
| COLEC10  | YWHAZ      | 164 | 23 | 6 | 63 | >3 | <0.001 | <0.001 | Co-occurrence |
| SNX27    | HIST2H2AC  | 208 | 7  | 4 | 37 | >3 | <0.001 | <0.001 | Co-occurrence |
| SNX27    | HIST2H2BE  | 208 | 7  | 4 | 37 | >3 | <0.001 | <0.001 | Co-occurrence |
| SNX27    | HIST2H4B   | 208 | 7  | 4 | 37 | >3 | <0.001 | <0.001 | Co-occurrence |
| ATAD2    | ATP6V1C1   | 168 | 19 | 8 | 61 | >3 | <0.001 | <0.001 | Co-occurrence |
| CD5L     | NUF2       | 208 | 6  | 5 | 37 | >3 | <0.001 | <0.001 | Co-occurrence |
| CD5L     | RGS5       | 208 | 6  | 5 | 37 | >3 | <0.001 | <0.001 | Co-occurrence |
| PEA15    | UBAP2L     | 204 | 6  | 7 | 39 | >3 | <0.001 | <0.001 | Co-occurrence |
| MTR      | CHML       | 218 | 5  | 2 | 31 | >3 | <0.001 | <0.001 | Co-occurrence |
| MTR      | EXO1       | 218 | 5  | 2 | 31 | >3 | <0.001 | <0.001 | Co-occurrence |
| CCT3     | NUF2       | 207 | 7  | 5 | 37 | >3 | <0.001 | <0.001 | Co-occurrence |
| COPA     | NUF2       | 207 | 7  | 5 | 37 | >3 | <0.001 | <0.001 | Co-occurrence |
| NCSTN    | NUF2       | 207 | 7  | 5 | 37 | >3 | <0.001 | <0.001 | Co-occurrence |
| CCT3     | RGS5       | 207 | 7  | 5 | 37 | >3 | <0.001 | <0.001 | Co-occurrence |
| COPA     | RGS5       | 207 | 7  | 5 | 37 | >3 | <0.001 | <0.001 | Co-occurrence |
| NCSTN    | RGS5       | 207 | 7  | 5 | 37 | >3 | <0.001 | <0.001 | Co-occurrence |
| SSR2     | RGS5       | 207 | 7  | 5 | 37 | >3 | <0.001 | <0.001 | Co-occurrence |
| NUF2     | SSR2       | 207 | 5  | 7 | 37 | >3 | <0.001 | <0.001 | Co-occurrence |
| CHD1L    | VPS45      | 210 | 3  | 8 | 35 | >3 | <0.001 | <0.001 | Co-occurrence |
| SNX27    | HIST2H2AA3 | 208 | 8  | 4 | 36 | >3 | <0.001 | <0.001 | Co-occurrence |
| SNX27    | HIST2H2BC  | 208 | 8  | 4 | 36 | >3 | <0.001 | <0.001 | Co-occurrence |
| SNX27    | HIST2H2AA4 | 208 | 8  | 4 | 36 | >3 | <0.001 | <0.001 | Co-occurrence |
| ATP6V1C1 | INTS8      | 183 | 20 | 4 | 49 | >3 | <0.001 | <0.001 | Co-occurrence |
| YWHAZ    | INTS8      | 183 | 20 | 4 | 49 | >3 | <0.001 | <0.001 | Co-occurrence |
| GBA      | NUF2       | 206 | 8  | 5 | 37 | >3 | <0.001 | <0.001 | Co-occurrence |
| GBAP1    | NUF2       | 206 | 8  | 5 | 37 | >3 | <0.001 | <0.001 | Co-occurrence |
| GBA      | RGS5       | 206 | 8  | 5 | 37 | >3 | <0.001 | <0.001 | Co-occurrence |
| GBAP1    | RGS5       | 206 | 8  | 5 | 37 | >3 | <0.001 | <0.001 | Co-occurrence |
| SNX27    | CHD1L      | 209 | 9  | 3 | 35 | >3 | <0.001 | <0.001 | Co-occurrence |

|          |            |     |    |    |    |    |        |        |               |
|----------|------------|-----|----|----|----|----|--------|--------|---------------|
| SQLE     | ATP6V1C1   | 167 | 20 | 9  | 60 | >3 | <0.001 | <0.001 | Co-occurrence |
| WASHC5   | ATP6V1C1   | 167 | 20 | 9  | 60 | >3 | <0.001 | <0.001 | Co-occurrence |
| COPA     | UBAP2L     | 204 | 6  | 8  | 38 | >3 | <0.001 | <0.001 | Co-occurrence |
| NCSTN    | UBAP2L     | 204 | 6  | 8  | 38 | >3 | <0.001 | <0.001 | Co-occurrence |
| ILF2     | PEA15      | 202 | 9  | 6  | 39 | >3 | <0.001 | <0.001 | Co-occurrence |
| S100A10  | HIST2H2AC  | 202 | 13 | 3  | 38 | >3 | <0.001 | <0.001 | Co-occurrence |
| S100A10  | HIST2H2BE  | 202 | 13 | 3  | 38 | >3 | <0.001 | <0.001 | Co-occurrence |
| S100A10  | HIST2H4B   | 202 | 13 | 3  | 38 | >3 | <0.001 | <0.001 | Co-occurrence |
| NUF2     | UBAP2L     | 205 | 5  | 9  | 37 | >3 | <0.001 | <0.001 | Co-occurrence |
| RGS5     | UBAP2L     | 205 | 5  | 9  | 37 | >3 | <0.001 | <0.001 | Co-occurrence |
| ZNF704   | ARMC1      | 204 | 12 | 3  | 37 | >3 | <0.001 | <0.001 | Co-occurrence |
| CHD1L    | PIP5K1A    | 210 | 4  | 8  | 34 | >3 | <0.001 | <0.001 | Co-occurrence |
| CHD1L    | PRUNE1     | 210 | 4  | 8  | 34 | >3 | <0.001 | <0.001 | Co-occurrence |
| ILF2     | COPA       | 202 | 10 | 6  | 38 | >3 | <0.001 | <0.001 | Co-occurrence |
| ILF2     | NCSTN      | 202 | 10 | 6  | 38 | >3 | <0.001 | <0.001 | Co-occurrence |
| CHD1L    | GOLPH3L    | 209 | 4  | 9  | 34 | >3 | <0.001 | <0.001 | Co-occurrence |
| S100A10  | HIST2H2AA3 | 202 | 14 | 3  | 37 | >3 | <0.001 | <0.001 | Co-occurrence |
| S100A10  | HIST2H2BC  | 202 | 14 | 3  | 37 | >3 | <0.001 | <0.001 | Co-occurrence |
| S100A10  | HIST2H2AA4 | 202 | 14 | 3  | 37 | >3 | <0.001 | <0.001 | Co-occurrence |
| ATAD2    | YWHAZ      | 166 | 21 | 10 | 59 | >3 | <0.001 | <0.001 | Co-occurrence |
| SQLE     | YWHAZ      | 166 | 21 | 10 | 59 | >3 | <0.001 | <0.001 | Co-occurrence |
| WASHC5   | YWHAZ      | 166 | 21 | 10 | 59 | >3 | <0.001 | <0.001 | Co-occurrence |
| S100A10  | CHD1L      | 203 | 15 | 2  | 36 | >3 | <0.001 | <0.001 | Co-occurrence |
| ILF2     | NUF2       | 203 | 11 | 5  | 37 | >3 | <0.001 | <0.001 | Co-occurrence |
| ILF2     | RGS5       | 203 | 11 | 5  | 37 | >3 | <0.001 | <0.001 | Co-occurrence |
| RBM12B   | ZNF704     | 194 | 13 | 7  | 42 | >3 | <0.001 | <0.001 | Co-occurrence |
| INTS8    | ZNF704     | 195 | 12 | 8  | 41 | >3 | <0.001 | <0.001 | Co-occurrence |
| LAPTM4B  | RIPK2      | 188 | 13 | 10 | 45 | >3 | <0.001 | <0.001 | Co-occurrence |
| MTR      | RBM34      | 215 | 6  | 5  | 30 | >3 | <0.001 | <0.001 | Co-occurrence |
| ATP6V1C1 | RBM12B     | 180 | 21 | 7  | 48 | >3 | <0.001 | <0.001 | Co-occurrence |
| YWHAZ    | RBM12B     | 180 | 21 | 7  | 48 | >3 | <0.001 | <0.001 | Co-occurrence |
| YWHAZ    | RIPK2      | 180 | 21 | 7  | 48 | >3 | <0.001 | <0.001 | Co-occurrence |
| RIPK2    | ARMC1      | 198 | 18 | 3  | 37 | >3 | <0.001 | <0.001 | Co-occurrence |
| ILF2     | GOLPH3L    | 201 | 12 | 7  | 36 | >3 | <0.001 | <0.001 | Co-occurrence |
| ILF2     | VPS45      | 201 | 12 | 7  | 36 | >3 | <0.001 | <0.001 | Co-occurrence |
| GNPAT    | RBM34      | 212 | 9  | 5  | 30 | >3 | <0.001 | <0.001 | Co-occurrence |
| SIPA1L2  | RBM34      | 212 | 9  | 5  | 30 | >3 | <0.001 | <0.001 | Co-occurrence |
| YWHAZ    | ZNF704     | 182 | 25 | 5  | 44 | >3 | <0.001 | <0.001 | Co-occurrence |
| TTC13    | RBM34      | 211 | 10 | 5  | 30 | >3 | <0.001 | <0.001 | Co-occurrence |
| ILF2     | PIP5K1A    | 201 | 13 | 7  | 35 | >3 | <0.001 | <0.001 | Co-occurrence |
| ILF2     | PRUNE1     | 201 | 13 | 7  | 35 | >3 | <0.001 | <0.001 | Co-occurrence |
| ATAD2    | LAPTM4B    | 169 | 29 | 7  | 51 | >3 | <0.001 | <0.001 | Co-occurrence |

|          |            |     |    |    |    |    |        |        |               |
|----------|------------|-----|----|----|----|----|--------|--------|---------------|
| SQLE     | LAPTM4B    | 169 | 29 | 7  | 51 | >3 | <0.001 | <0.001 | Co-occurrence |
| WASHC5   | LAPTM4B    | 169 | 29 | 7  | 51 | >3 | <0.001 | <0.001 | Co-occurrence |
| S100A10  | ILF2       | 195 | 13 | 10 | 38 | >3 | <0.001 | <0.001 | Co-occurrence |
| UBAP2L   | PIP5K1A    | 202 | 12 | 8  | 34 | >3 | <0.001 | <0.001 | Co-occurrence |
| UBAP2L   | PRUNE1     | 202 | 12 | 8  | 34 | >3 | <0.001 | <0.001 | Co-occurrence |
| ATAD2    | RBM12B     | 170 | 31 | 6  | 49 | >3 | <0.001 | <0.001 | Co-occurrence |
| ATP6V1C1 | RIPK2      | 178 | 23 | 9  | 46 | >3 | <0.001 | <0.001 | Co-occurrence |
| GBA      | CHD1L      | 205 | 13 | 6  | 32 | >3 | <0.001 | <0.001 | Co-occurrence |
| GBAP1    | CHD1L      | 205 | 13 | 6  | 32 | >3 | <0.001 | <0.001 | Co-occurrence |
| ATP6V1C1 | ZNF704     | 181 | 26 | 6  | 43 | >3 | <0.001 | <0.001 | Co-occurrence |
| LAPTM4B  | ZNF704     | 189 | 18 | 9  | 40 | >3 | <0.001 | <0.001 | Co-occurrence |
| ILF2     | SNX27      | 199 | 13 | 9  | 35 | >3 | <0.001 | <0.001 | Co-occurrence |
| UBAP2L   | GOLPH3L    | 201 | 12 | 9  | 34 | >3 | <0.001 | <0.001 | Co-occurrence |
| UBAP2L   | VPS45      | 201 | 12 | 9  | 34 | >3 | <0.001 | <0.001 | Co-occurrence |
| TARBP1   | GNPAT      | 207 | 10 | 8  | 31 | >3 | <0.001 | <0.001 | Co-occurrence |
| TARBP1   | SIPA1L2    | 207 | 10 | 8  | 31 | >3 | <0.001 | <0.001 | Co-occurrence |
| GBA      | SNX27      | 201 | 11 | 10 | 34 | >3 | <0.001 | <0.001 | Co-occurrence |
| GBAP1    | SNX27      | 201 | 11 | 10 | 34 | >3 | <0.001 | <0.001 | Co-occurrence |
| RBM34    | CHML       | 215 | 8  | 6  | 27 | >3 | <0.001 | <0.001 | Co-occurrence |
| RBM34    | EXO1       | 215 | 8  | 6  | 27 | >3 | <0.001 | <0.001 | Co-occurrence |
| S100A10  | GBA        | 196 | 15 | 9  | 36 | >3 | <0.001 | <0.001 | Co-occurrence |
| S100A10  | GBAP1      | 196 | 15 | 9  | 36 | >3 | <0.001 | <0.001 | Co-occurrence |
| GBA      | PIP5K1A    | 202 | 12 | 9  | 33 | >3 | <0.001 | <0.001 | Co-occurrence |
| GBAP1    | PIP5K1A    | 202 | 12 | 9  | 33 | >3 | <0.001 | <0.001 | Co-occurrence |
| GBA      | PRUNE1     | 202 | 12 | 9  | 33 | >3 | <0.001 | <0.001 | Co-occurrence |
| GBAP1    | PRUNE1     | 202 | 12 | 9  | 33 | >3 | <0.001 | <0.001 | Co-occurrence |
| SNX27    | UBAP2L     | 200 | 10 | 12 | 34 | >3 | <0.001 | <0.001 | Co-occurrence |
| TARBP1   | TTC13      | 206 | 10 | 9  | 31 | >3 | <0.001 | <0.001 | Co-occurrence |
| ATAD2    | INTS8      | 170 | 33 | 6  | 47 | >3 | <0.001 | <0.001 | Co-occurrence |
| SQLE     | RBM12B     | 169 | 32 | 7  | 48 | >3 | <0.001 | <0.001 | Co-occurrence |
| WASHC5   | RBM12B     | 169 | 32 | 7  | 48 | >3 | <0.001 | <0.001 | Co-occurrence |
| CCT3     | CHD1L      | 205 | 13 | 7  | 31 | >3 | <0.001 | <0.001 | Co-occurrence |
| SSR2     | CHD1L      | 205 | 13 | 7  | 31 | >3 | <0.001 | <0.001 | Co-occurrence |
| GBA      | HIST2H2AA3 | 203 | 13 | 8  | 32 | >3 | <0.001 | <0.001 | Co-occurrence |
| GBAP1    | HIST2H2AA3 | 203 | 13 | 8  | 32 | >3 | <0.001 | <0.001 | Co-occurrence |
| GBA      | HIST2H2BC  | 203 | 13 | 8  | 32 | >3 | <0.001 | <0.001 | Co-occurrence |
| GBAP1    | HIST2H2BC  | 203 | 13 | 8  | 32 | >3 | <0.001 | <0.001 | Co-occurrence |
| GBA      | HIST2H2AA4 | 203 | 13 | 8  | 32 | >3 | <0.001 | <0.001 | Co-occurrence |
| GBAP1    | HIST2H2AA4 | 203 | 13 | 8  | 32 | >3 | <0.001 | <0.001 | Co-occurrence |
| COLEC10  | LAPTM4B    | 163 | 35 | 7  | 51 | >3 | <0.001 | <0.001 | Co-occurrence |
| S100A10  | UBAP2L     | 195 | 15 | 10 | 36 | >3 | <0.001 | <0.001 | Co-occurrence |
| GBA      | GOLPH3L    | 201 | 12 | 10 | 33 | >3 | <0.001 | <0.001 | Co-occurrence |

|         |            |     |    |    |    |    |        |        |               |
|---------|------------|-----|----|----|----|----|--------|--------|---------------|
| GBAP1   | GOLPH3L    | 201 | 12 | 10 | 33 | >3 | <0.001 | <0.001 | Co-occurrence |
| GBA     | VPS45      | 201 | 12 | 10 | 33 | >3 | <0.001 | <0.001 | Co-occurrence |
| GBAP1   | VPS45      | 201 | 12 | 10 | 33 | >3 | <0.001 | <0.001 | Co-occurrence |
| CCT3    | SNX27      | 201 | 11 | 11 | 33 | >3 | <0.001 | <0.001 | Co-occurrence |
| SSR2    | SNX27      | 201 | 11 | 11 | 33 | >3 | <0.001 | <0.001 | Co-occurrence |
| ILF2    | HIST2H2AC  | 200 | 15 | 8  | 33 | >3 | <0.001 | <0.001 | Co-occurrence |
| ILF2    | HIST2H2BE  | 200 | 15 | 8  | 33 | >3 | <0.001 | <0.001 | Co-occurrence |
| ILF2    | HIST2H4B   | 200 | 15 | 8  | 33 | >3 | <0.001 | <0.001 | Co-occurrence |
| S100A10 | CCT3       | 196 | 16 | 9  | 35 | >3 | <0.001 | <0.001 | Co-occurrence |
| S100A10 | SSR2       | 196 | 16 | 9  | 35 | >3 | <0.001 | <0.001 | Co-occurrence |
| UBAP2L  | HIST2H2AA3 | 202 | 14 | 8  | 32 | >3 | <0.001 | <0.001 | Co-occurrence |
| UBAP2L  | HIST2H2BC  | 202 | 14 | 8  | 32 | >3 | <0.001 | <0.001 | Co-occurrence |
| UBAP2L  | HIST2H2AA4 | 202 | 14 | 8  | 32 | >3 | <0.001 | <0.001 | Co-occurrence |
| GBA     | HIST2H2AC  | 202 | 13 | 9  | 32 | >3 | <0.001 | <0.001 | Co-occurrence |
| GBAP1   | HIST2H2AC  | 202 | 13 | 9  | 32 | >3 | <0.001 | <0.001 | Co-occurrence |
| GBA     | HIST2H2BE  | 202 | 13 | 9  | 32 | >3 | <0.001 | <0.001 | Co-occurrence |
| GBAP1   | HIST2H2BE  | 202 | 13 | 9  | 32 | >3 | <0.001 | <0.001 | Co-occurrence |
| GBA     | HIST2H4B   | 202 | 13 | 9  | 32 | >3 | <0.001 | <0.001 | Co-occurrence |
| GBAP1   | HIST2H4B   | 202 | 13 | 9  | 32 | >3 | <0.001 | <0.001 | Co-occurrence |
| TARBP1  | MTR        | 208 | 12 | 7  | 29 | >3 | <0.001 | <0.001 | Co-occurrence |
| CCT3    | PIP5K1A    | 202 | 12 | 10 | 32 | >3 | <0.001 | <0.001 | Co-occurrence |
| SSR2    | PIP5K1A    | 202 | 12 | 10 | 32 | >3 | <0.001 | <0.001 | Co-occurrence |
| CCT3    | PRUNE1     | 202 | 12 | 10 | 32 | >3 | <0.001 | <0.001 | Co-occurrence |
| SSR2    | PRUNE1     | 202 | 12 | 10 | 32 | >3 | <0.001 | <0.001 | Co-occurrence |
| UBAP2L  | CHD1L      | 203 | 15 | 7  | 31 | >3 | <0.001 | <0.001 | Co-occurrence |
| UBAP2L  | HIST2H2AC  | 201 | 14 | 9  | 32 | >3 | <0.001 | <0.001 | Co-occurrence |
| UBAP2L  | HIST2H2BE  | 201 | 14 | 9  | 32 | >3 | <0.001 | <0.001 | Co-occurrence |
| UBAP2L  | HIST2H4B   | 201 | 14 | 9  | 32 | >3 | <0.001 | <0.001 | Co-occurrence |
| CD5L    | CHD1L      | 205 | 13 | 8  | 30 | >3 | <0.001 | <0.001 | Co-occurrence |
| CCT3    | HIST2H2AA3 | 203 | 13 | 9  | 31 | >3 | <0.001 | <0.001 | Co-occurrence |
| SSR2    | HIST2H2AA3 | 203 | 13 | 9  | 31 | >3 | <0.001 | <0.001 | Co-occurrence |
| CCT3    | HIST2H2BC  | 203 | 13 | 9  | 31 | >3 | <0.001 | <0.001 | Co-occurrence |
| SSR2    | HIST2H2BC  | 203 | 13 | 9  | 31 | >3 | <0.001 | <0.001 | Co-occurrence |
| CCT3    | HIST2H2AA4 | 203 | 13 | 9  | 31 | >3 | <0.001 | <0.001 | Co-occurrence |
| SSR2    | HIST2H2AA4 | 203 | 13 | 9  | 31 | >3 | <0.001 | <0.001 | Co-occurrence |
| CCT3    | GOLPH3L    | 201 | 12 | 11 | 32 | >3 | <0.001 | <0.001 | Co-occurrence |
| SSR2    | GOLPH3L    | 201 | 12 | 11 | 32 | >3 | <0.001 | <0.001 | Co-occurrence |
| CCT3    | VPS45      | 201 | 12 | 11 | 32 | >3 | <0.001 | <0.001 | Co-occurrence |
| SSR2    | VPS45      | 201 | 12 | 11 | 32 | >3 | <0.001 | <0.001 | Co-occurrence |
| CD5L    | SNX27      | 201 | 11 | 12 | 32 | >3 | <0.001 | <0.001 | Co-occurrence |
| GNPAT   | ACBD3      | 211 | 12 | 6  | 27 | >3 | <0.001 | <0.001 | Co-occurrence |
| S100A10 | CD5L       | 196 | 17 | 9  | 34 | >3 | <0.001 | <0.001 | Co-occurrence |

|         |            |     |    |    |    |       |        |        |               |
|---------|------------|-----|----|----|----|-------|--------|--------|---------------|
| ILF2    | HIST2H2AA3 | 200 | 16 | 8  | 32 | >3    | <0.001 | <0.001 | Co-occurrence |
| ILF2    | HIST2H2BC  | 200 | 16 | 8  | 32 | >3    | <0.001 | <0.001 | Co-occurrence |
| ILF2    | HIST2H2AA4 | 200 | 16 | 8  | 32 | >3    | <0.001 | <0.001 | Co-occurrence |
| GNPAT   | MTR        | 209 | 11 | 8  | 28 | >3    | <0.001 | <0.001 | Co-occurrence |
| SIPA1L2 | MTR        | 209 | 11 | 8  | 28 | >3    | <0.001 | <0.001 | Co-occurrence |
| ILF2    | CHD1L      | 201 | 17 | 7  | 31 | >3    | <0.001 | <0.001 | Co-occurrence |
| CCT3    | HIST2H2AC  | 202 | 13 | 10 | 31 | >3    | <0.001 | <0.001 | Co-occurrence |
| SSR2    | HIST2H2AC  | 202 | 13 | 10 | 31 | >3    | <0.001 | <0.001 | Co-occurrence |
| CCT3    | HIST2H2BE  | 202 | 13 | 10 | 31 | >3    | <0.001 | <0.001 | Co-occurrence |
| SSR2    | HIST2H2BE  | 202 | 13 | 10 | 31 | >3    | <0.001 | <0.001 | Co-occurrence |
| CCT3    | HIST2H4B   | 202 | 13 | 10 | 31 | >3    | <0.001 | <0.001 | Co-occurrence |
| SSR2    | HIST2H4B   | 202 | 13 | 10 | 31 | >3    | <0.001 | <0.001 | Co-occurrence |
| TTC13   | ACBD3      | 210 | 13 | 6  | 27 | >3    | <0.001 | <0.001 | Co-occurrence |
| COLEC10 | INTS8      | 164 | 39 | 6  | 47 | >3    | <0.001 | <0.001 | Co-occurrence |
| INTS8   | ARMC1      | 196 | 20 | 7  | 33 | >3    | <0.001 | <0.001 | Co-occurrence |
| TTC13   | MTR        | 208 | 12 | 8  | 28 | >3    | <0.001 | <0.001 | Co-occurrence |
| PEA15   | CHD1L      | 203 | 15 | 8  | 30 | >3    | <0.001 | <0.001 | Co-occurrence |
| TAGLN2  | CHD1L      | 203 | 15 | 8  | 30 | >3    | <0.001 | <0.001 | Co-occurrence |
| PEA15   | SNX27      | 199 | 13 | 12 | 32 | >3    | <0.001 | <0.001 | Co-occurrence |
| SNX27   | TAGLN2     | 199 | 12 | 13 | 32 | >3    | <0.001 | <0.001 | Co-occurrence |
| NUF2    | CHD1L      | 205 | 13 | 9  | 29 | >3    | <0.001 | <0.001 | Co-occurrence |
| RGS5    | CHD1L      | 205 | 13 | 9  | 29 | >3    | <0.001 | <0.001 | Co-occurrence |
| S100A10 | PEA15      | 194 | 17 | 11 | 34 | >3    | <0.001 | <0.001 | Co-occurrence |
| S100A10 | TAGLN2     | 194 | 17 | 11 | 34 | >3    | <0.001 | <0.001 | Co-occurrence |
| YWHAZ   | ARMC1      | 183 | 33 | 4  | 36 | >3    | <0.001 | <0.001 | Co-occurrence |
| RBM12B  | ARMC1      | 194 | 22 | 7  | 33 | >3    | <0.001 | <0.001 | Co-occurrence |
| SQLE    | INTS8      | 168 | 35 | 8  | 45 | >3    | <0.001 | <0.001 | Co-occurrence |
| WASHC5  | INTS8      | 168 | 35 | 8  | 45 | >3    | <0.001 | <0.001 | Co-occurrence |
| ATAD2   | RIPK2      | 167 | 34 | 9  | 46 | >3    | <0.001 | <0.001 | Co-occurrence |
| SIPA1L2 | ACBD3      | 210 | 13 | 7  | 26 | >3    | <0.001 | <0.001 | Co-occurrence |
| SIPA1L2 | CHML       | 210 | 13 | 7  | 26 | >3    | <0.001 | <0.001 | Co-occurrence |
| SIPA1L2 | EXO1       | 210 | 13 | 7  | 26 | >3    | <0.001 | <0.001 | Co-occurrence |
| COPA    | CHD1L      | 203 | 15 | 9  | 29 | >3    | <0.001 | <0.001 | Co-occurrence |
| NCSTN   | CHD1L      | 203 | 15 | 9  | 29 | >3    | <0.001 | <0.001 | Co-occurrence |
| COPA    | SNX27      | 199 | 13 | 13 | 31 | >3    | <0.001 | <0.001 | Co-occurrence |
| NCSTN   | SNX27      | 199 | 13 | 13 | 31 | >3    | <0.001 | <0.001 | Co-occurrence |
| COLEC10 | RBM12B     | 162 | 39 | 8  | 47 | >3    | <0.001 | <0.001 | Co-occurrence |
| CD5L    | PIP5K1A    | 201 | 13 | 12 | 30 | >3    | <0.001 | <0.001 | Co-occurrence |
| CD5L    | PRUNE1     | 201 | 13 | 12 | 30 | >3    | <0.001 | <0.001 | Co-occurrence |
| S100A10 | COPA       | 194 | 18 | 11 | 33 | >3    | <0.001 | <0.001 | Co-occurrence |
| S100A10 | NCSTN      | 194 | 18 | 11 | 33 | >3    | <0.001 | <0.001 | Co-occurrence |
| ATAD2   | GPAA1      | 160 | 29 | 16 | 51 | 2.867 | <0.001 | <0.001 | Co-occurrence |

|          |            |     |    |    |    |       |        |        |               |
|----------|------------|-----|----|----|----|-------|--------|--------|---------------|
| LAPTM4B  | ARMC1      | 191 | 25 | 7  | 33 | >3    | <0.001 | <0.001 | Co-occurrence |
| S100A10  | NUF2       | 195 | 19 | 10 | 32 | >3    | <0.001 | <0.001 | Co-occurrence |
| S100A10  | RGS5       | 195 | 19 | 10 | 32 | >3    | <0.001 | <0.001 | Co-occurrence |
| NUF2     | SNX27      | 200 | 12 | 14 | 30 | >3    | <0.001 | <0.001 | Co-occurrence |
| RGS5     | SNX27      | 200 | 12 | 14 | 30 | >3    | <0.001 | <0.001 | Co-occurrence |
| CD5L     | GOLPH3L    | 200 | 13 | 13 | 30 | >3    | <0.001 | <0.001 | Co-occurrence |
| CD5L     | VPS45      | 200 | 13 | 13 | 30 | >3    | <0.001 | <0.001 | Co-occurrence |
| CD5L     | HIST2H2AA3 | 202 | 14 | 11 | 29 | >3    | <0.001 | <0.001 | Co-occurrence |
| CD5L     | HIST2H2BC  | 202 | 14 | 11 | 29 | >3    | <0.001 | <0.001 | Co-occurrence |
| CD5L     | HIST2H2AA4 | 202 | 14 | 11 | 29 | >3    | <0.001 | <0.001 | Co-occurrence |
| TARBP1   | CHML       | 208 | 15 | 7  | 26 | >3    | <0.001 | <0.001 | Co-occurrence |
| TARBP1   | EXO1       | 208 | 15 | 7  | 26 | >3    | <0.001 | <0.001 | Co-occurrence |
| ATAD2    | ZNF704     | 169 | 38 | 7  | 42 | >3    | <0.001 | <0.001 | Co-occurrence |
| SQLE     | RIPK2      | 166 | 35 | 10 | 45 | >3    | <0.001 | <0.001 | Co-occurrence |
| WASHC5   | RIPK2      | 166 | 35 | 10 | 45 | >3    | <0.001 | <0.001 | Co-occurrence |
| ATP6V1C1 | ARMC1      | 182 | 34 | 5  | 35 | >3    | <0.001 | <0.001 | Co-occurrence |
| PEA15    | PIP5K1A    | 199 | 15 | 12 | 30 | >3    | <0.001 | <0.001 | Co-occurrence |
| TAGLN2   | PIP5K1A    | 199 | 15 | 12 | 30 | >3    | <0.001 | <0.001 | Co-occurrence |
| PEA15    | PRUNE1     | 199 | 15 | 12 | 30 | >3    | <0.001 | <0.001 | Co-occurrence |
| TAGLN2   | PRUNE1     | 199 | 15 | 12 | 30 | >3    | <0.001 | <0.001 | Co-occurrence |
| CD5L     | HIST2H2AC  | 201 | 14 | 12 | 29 | >3    | <0.001 | <0.001 | Co-occurrence |
| CD5L     | HIST2H2BE  | 201 | 14 | 12 | 29 | >3    | <0.001 | <0.001 | Co-occurrence |
| CD5L     | HIST2H4B   | 201 | 14 | 12 | 29 | >3    | <0.001 | <0.001 | Co-occurrence |
| NUF2     | PIP5K1A    | 201 | 13 | 13 | 29 | >3    | <0.001 | <0.001 | Co-occurrence |
| RGS5     | PIP5K1A    | 201 | 13 | 13 | 29 | >3    | <0.001 | <0.001 | Co-occurrence |
| NUF2     | PRUNE1     | 201 | 13 | 13 | 29 | >3    | <0.001 | <0.001 | Co-occurrence |
| RGS5     | PRUNE1     | 201 | 13 | 13 | 29 | >3    | <0.001 | <0.001 | Co-occurrence |
| COLEC10  | RIPK2      | 161 | 40 | 9  | 46 | >3    | <0.001 | <0.001 | Co-occurrence |
| SQLE     | GPAA1      | 159 | 30 | 17 | 50 | 2.747 | <0.001 | <0.001 | Co-occurrence |
| WASHC5   | GPAA1      | 159 | 30 | 17 | 50 | 2.747 | <0.001 | <0.001 | Co-occurrence |
| GNPAT    | CHML       | 209 | 14 | 8  | 25 | >3    | <0.001 | <0.001 | Co-occurrence |
| GNPAT    | EXO1       | 209 | 14 | 8  | 25 | >3    | <0.001 | <0.001 | Co-occurrence |
| PEA15    | HIST2H2AA3 | 200 | 16 | 11 | 29 | >3    | <0.001 | <0.001 | Co-occurrence |
| TAGLN2   | HIST2H2AA3 | 200 | 16 | 11 | 29 | >3    | <0.001 | <0.001 | Co-occurrence |
| PEA15    | HIST2H2BC  | 200 | 16 | 11 | 29 | >3    | <0.001 | <0.001 | Co-occurrence |
| TAGLN2   | HIST2H2BC  | 200 | 16 | 11 | 29 | >3    | <0.001 | <0.001 | Co-occurrence |
| PEA15    | HIST2H2AA4 | 200 | 16 | 11 | 29 | >3    | <0.001 | <0.001 | Co-occurrence |
| TAGLN2   | HIST2H2AA4 | 200 | 16 | 11 | 29 | >3    | <0.001 | <0.001 | Co-occurrence |
| PEA15    | GOLPH3L    | 198 | 15 | 13 | 30 | >3    | <0.001 | <0.001 | Co-occurrence |
| TAGLN2   | GOLPH3L    | 198 | 15 | 13 | 30 | >3    | <0.001 | <0.001 | Co-occurrence |
| PEA15    | VPS45      | 198 | 15 | 13 | 30 | >3    | <0.001 | <0.001 | Co-occurrence |
| TAGLN2   | VPS45      | 198 | 15 | 13 | 30 | >3    | <0.001 | <0.001 | Co-occurrence |

|          |            |     |    |    |    |       |        |        |               |
|----------|------------|-----|----|----|----|-------|--------|--------|---------------|
| NUF2     | GOLPH3L    | 200 | 13 | 14 | 29 | >3    | <0.001 | <0.001 | Co-occurrence |
| RGS5     | GOLPH3L    | 200 | 13 | 14 | 29 | >3    | <0.001 | <0.001 | Co-occurrence |
| NUF2     | VPS45      | 200 | 13 | 14 | 29 | >3    | <0.001 | <0.001 | Co-occurrence |
| RGS5     | VPS45      | 200 | 13 | 14 | 29 | >3    | <0.001 | <0.001 | Co-occurrence |
| TTC13    | CHML       | 208 | 15 | 8  | 25 | >3    | <0.001 | <0.001 | Co-occurrence |
| TTC13    | EXO1       | 208 | 15 | 8  | 25 | >3    | <0.001 | <0.001 | Co-occurrence |
| PEA15    | HIST2H2AC  | 199 | 16 | 12 | 29 | >3    | <0.001 | <0.001 | Co-occurrence |
| TAGLN2   | HIST2H2AC  | 199 | 16 | 12 | 29 | >3    | <0.001 | <0.001 | Co-occurrence |
| PEA15    | HIST2H2BE  | 199 | 16 | 12 | 29 | >3    | <0.001 | <0.001 | Co-occurrence |
| TAGLN2   | HIST2H2BE  | 199 | 16 | 12 | 29 | >3    | <0.001 | <0.001 | Co-occurrence |
| PEA15    | HIST2H4B   | 199 | 16 | 12 | 29 | >3    | <0.001 | <0.001 | Co-occurrence |
| TAGLN2   | HIST2H4B   | 199 | 16 | 12 | 29 | >3    | <0.001 | <0.001 | Co-occurrence |
| COPA     | PIP5K1A    | 199 | 15 | 13 | 29 | >3    | <0.001 | <0.001 | Co-occurrence |
| NCSTN    | PIP5K1A    | 199 | 15 | 13 | 29 | >3    | <0.001 | <0.001 | Co-occurrence |
| COPA     | PRUNE1     | 199 | 15 | 13 | 29 | >3    | <0.001 | <0.001 | Co-occurrence |
| NCSTN    | PRUNE1     | 199 | 15 | 13 | 29 | >3    | <0.001 | <0.001 | Co-occurrence |
| COLEC10  | GPAA1      | 154 | 35 | 16 | 51 | 2.641 | <0.001 | <0.001 | Co-occurrence |
| COLEC10  | ZNF704     | 163 | 44 | 7  | 42 | >3    | <0.001 | <0.001 | Co-occurrence |
| COPA     | GOLPH3L    | 198 | 15 | 14 | 29 | >3    | <0.001 | <0.001 | Co-occurrence |
| NCSTN    | GOLPH3L    | 198 | 15 | 14 | 29 | >3    | <0.001 | <0.001 | Co-occurrence |
| COPA     | VPS45      | 198 | 15 | 14 | 29 | >3    | <0.001 | <0.001 | Co-occurrence |
| NCSTN    | VPS45      | 198 | 15 | 14 | 29 | >3    | <0.001 | <0.001 | Co-occurrence |
| COPA     | HIST2H2AA3 | 200 | 16 | 12 | 28 | >3    | <0.001 | <0.001 | Co-occurrence |
| NCSTN    | HIST2H2AA3 | 200 | 16 | 12 | 28 | >3    | <0.001 | <0.001 | Co-occurrence |
| COPA     | HIST2H2BC  | 200 | 16 | 12 | 28 | >3    | <0.001 | <0.001 | Co-occurrence |
| NCSTN    | HIST2H2BC  | 200 | 16 | 12 | 28 | >3    | <0.001 | <0.001 | Co-occurrence |
| COPA     | HIST2H2AA4 | 200 | 16 | 12 | 28 | >3    | <0.001 | <0.001 | Co-occurrence |
| NCSTN    | HIST2H2AA4 | 200 | 16 | 12 | 28 | >3    | <0.001 | <0.001 | Co-occurrence |
| ATP6V1C1 | GPAA1      | 165 | 24 | 22 | 45 | 2.644 | <0.001 | <0.001 | Co-occurrence |
| GPAA1    | YWHAZ      | 165 | 22 | 24 | 45 | 2.644 | <0.001 | <0.001 | Co-occurrence |
| COPA     | HIST2H2AC  | 199 | 16 | 13 | 28 | >3    | <0.001 | <0.001 | Co-occurrence |
| NCSTN    | HIST2H2AC  | 199 | 16 | 13 | 28 | >3    | <0.001 | <0.001 | Co-occurrence |
| COPA     | HIST2H2BE  | 199 | 16 | 13 | 28 | >3    | <0.001 | <0.001 | Co-occurrence |
| NCSTN    | HIST2H2BE  | 199 | 16 | 13 | 28 | >3    | <0.001 | <0.001 | Co-occurrence |
| COPA     | HIST2H4B   | 199 | 16 | 13 | 28 | >3    | <0.001 | <0.001 | Co-occurrence |
| NCSTN    | HIST2H4B   | 199 | 16 | 13 | 28 | >3    | <0.001 | <0.001 | Co-occurrence |
| NUF2     | HIST2H2AA3 | 201 | 15 | 13 | 27 | >3    | <0.001 | <0.001 | Co-occurrence |
| RGS5     | HIST2H2AA3 | 201 | 15 | 13 | 27 | >3    | <0.001 | <0.001 | Co-occurrence |
| NUF2     | HIST2H2BC  | 201 | 15 | 13 | 27 | >3    | <0.001 | <0.001 | Co-occurrence |
| RGS5     | HIST2H2BC  | 201 | 15 | 13 | 27 | >3    | <0.001 | <0.001 | Co-occurrence |
| NUF2     | HIST2H2AA4 | 201 | 15 | 13 | 27 | >3    | <0.001 | <0.001 | Co-occurrence |
| RGS5     | HIST2H2AA4 | 201 | 15 | 13 | 27 | >3    | <0.001 | <0.001 | Co-occurrence |



|         |           |     |    |    |    |       |        |        |               |
|---------|-----------|-----|----|----|----|-------|--------|--------|---------------|
| SQLE    | ZNF704    | 167 | 40 | 9  | 40 | 2.921 | <0.001 | <0.001 | Co-occurrence |
| WASHC5  | ZNF704    | 167 | 40 | 9  | 40 | 2.921 | <0.001 | <0.001 | Co-occurrence |
| MTR     | ACBD3     | 210 | 13 | 10 | 23 | >3    | <0.001 | <0.001 | Co-occurrence |
| NUF2    | HIST2H2AC | 200 | 15 | 14 | 27 | >3    | <0.001 | <0.001 | Co-occurrence |
| RGS5    | HIST2H2AC | 200 | 15 | 14 | 27 | >3    | <0.001 | <0.001 | Co-occurrence |
| NUF2    | HIST2H2BE | 200 | 15 | 14 | 27 | >3    | <0.001 | <0.001 | Co-occurrence |
| RGS5    | HIST2H2BE | 200 | 15 | 14 | 27 | >3    | <0.001 | <0.001 | Co-occurrence |
| NUF2    | HIST2H4B  | 200 | 15 | 14 | 27 | >3    | <0.001 | <0.001 | Co-occurrence |
| RGS5    | HIST2H4B  | 200 | 15 | 14 | 27 | >3    | <0.001 | <0.001 | Co-occurrence |
| COLEC10 | ARMC1     | 166 | 50 | 4  | 36 | >3    | <0.001 | <0.001 | Co-occurrence |
| GPAA1   | LAPTM4B   | 171 | 27 | 18 | 40 | 2.644 | <0.001 | <0.001 | Co-occurrence |
| RBM34   | ACBD3     | 210 | 13 | 11 | 22 | >3    | <0.001 | <0.001 | Co-occurrence |
| ATAD2   | ARMC1     | 170 | 46 | 6  | 34 | >3    | <0.001 | <0.001 | Co-occurrence |
| GPAA1   | INTS8     | 173 | 30 | 16 | 37 | 2.59  | <0.001 | <0.001 | Co-occurrence |
| GPAA1   | RBM12B    | 171 | 30 | 18 | 37 | 2.461 | <0.001 | <0.001 | Co-occurrence |
| SQLE    | ARMC1     | 169 | 47 | 7  | 33 | 2.83  | <0.001 | <0.001 | Co-occurrence |
| WASHC5  | ARMC1     | 169 | 47 | 7  | 33 | 2.83  | <0.001 | <0.001 | Co-occurrence |
| TARBP1  | ACBD3     | 204 | 19 | 11 | 22 | >3    | <0.001 | <0.001 | Co-occurrence |
| GPAA1   | ZNF704    | 174 | 33 | 15 | 34 | 2.481 | <0.001 | <0.001 | Co-occurrence |
| GPAA1   | RIPK2     | 170 | 31 | 19 | 36 | 2.341 | <0.001 | <0.001 | Co-occurrence |
| ACBD3   | CHML      | 209 | 14 | 14 | 19 | >3    | <0.001 | <0.001 | Co-occurrence |
| ACBD3   | EXO1      | 209 | 14 | 14 | 19 | >3    | <0.001 | <0.001 | Co-occurrence |
| GPAA1   | ARMC1     | 176 | 40 | 13 | 27 | 2.212 | <0.001 | <0.001 | Co-occurrence |
| CD5L    | GNPAT     | 194 | 23 | 19 | 20 | 2.184 | <0.001 | <0.001 | Co-occurrence |
| CD5L    | TTC13     | 193 | 23 | 20 | 20 | 2.127 | <0.001 | <0.001 | Co-occurrence |
| PEA15   | GNPAT     | 192 | 25 | 19 | 20 | 2.09  | <0.001 | <0.001 | Co-occurrence |
| TAGLN2  | GNPAT     | 192 | 25 | 19 | 20 | 2.09  | <0.001 | <0.001 | Co-occurrence |
| PEA15   | TTC13     | 191 | 25 | 20 | 20 | 2.033 | <0.001 | <0.001 | Co-occurrence |
| TAGLN2  | TTC13     | 191 | 25 | 20 | 20 | 2.033 | <0.001 | <0.001 | Co-occurrence |
| CCT3    | GNPAT     | 192 | 25 | 20 | 19 | 1.987 | <0.001 | <0.001 | Co-occurrence |
| COPA    | GNPAT     | 192 | 25 | 20 | 19 | 1.987 | <0.001 | <0.001 | Co-occurrence |
| NCSTN   | GNPAT     | 192 | 25 | 20 | 19 | 1.987 | <0.001 | <0.001 | Co-occurrence |
| SSR2    | GNPAT     | 192 | 25 | 20 | 19 | 1.987 | <0.001 | <0.001 | Co-occurrence |
| CD5L    | ACBD3     | 197 | 26 | 16 | 17 | 2.086 | <0.001 | <0.001 | Co-occurrence |
| GBA     | GNPAT     | 191 | 26 | 20 | 19 | 1.943 | <0.001 | <0.001 | Co-occurrence |
| GBAP1   | GNPAT     | 191 | 26 | 20 | 19 | 1.943 | <0.001 | <0.001 | Co-occurrence |
| CCT3    | TTC13     | 191 | 25 | 21 | 19 | 1.933 | <0.001 | <0.001 | Co-occurrence |
| COPA    | TTC13     | 191 | 25 | 21 | 19 | 1.933 | <0.001 | <0.001 | Co-occurrence |
| NCSTN   | TTC13     | 191 | 25 | 21 | 19 | 1.933 | <0.001 | <0.001 | Co-occurrence |
| SSR2    | TTC13     | 191 | 25 | 21 | 19 | 1.933 | <0.001 | <0.001 | Co-occurrence |
| CD5L    | TARBP1    | 191 | 24 | 22 | 19 | 1.928 | <0.001 | <0.001 | Co-occurrence |
| GBA     | TTC13     | 190 | 26 | 21 | 19 | 1.889 | <0.001 | 0.001  | Co-occurrence |

|         |         |     |    |    |    |       |        |       |               |
|---------|---------|-----|----|----|----|-------|--------|-------|---------------|
| GBAP1   | TTC13   | 190 | 26 | 21 | 19 | 1.889 | <0.001 | 0.001 | Co-occurrence |
| NUF2    | GNPAT   | 193 | 24 | 21 | 18 | 1.93  | <0.001 | 0.002 | Co-occurrence |
| RGS5    | GNPAT   | 193 | 24 | 21 | 18 | 1.93  | <0.001 | 0.002 | Co-occurrence |
| CD5L    | SIPA1L2 | 192 | 25 | 21 | 18 | 1.884 | <0.001 | 0.002 | Co-occurrence |
| NUF2    | TTC13   | 192 | 24 | 22 | 18 | 1.879 | <0.001 | 0.003 | Co-occurrence |
| RGS5    | TTC13   | 192 | 24 | 22 | 18 | 1.879 | <0.001 | 0.003 | Co-occurrence |
| NUF2    | ACBD3   | 197 | 26 | 17 | 16 | 1.964 | <0.001 | 0.004 | Co-occurrence |
| RGS5    | ACBD3   | 197 | 26 | 17 | 16 | 1.964 | <0.001 | 0.004 | Co-occurrence |
| CHD1L   | ACBD3   | 200 | 23 | 18 | 15 | 1.981 | <0.001 | 0.005 | Co-occurrence |
| PEA15   | SIPA1L2 | 190 | 27 | 21 | 18 | 1.797 | <0.001 | 0.006 | Co-occurrence |
| TAGLN2  | SIPA1L2 | 190 | 27 | 21 | 18 | 1.797 | <0.001 | 0.006 | Co-occurrence |
| CCT3    | ACBD3   | 195 | 28 | 17 | 16 | 1.88  | <0.001 | 0.008 | Co-occurrence |
| SSR2    | ACBD3   | 195 | 28 | 17 | 16 | 1.88  | <0.001 | 0.008 | Co-occurrence |
| UBAP2L  | GNPAT   | 189 | 28 | 21 | 18 | 1.755 | <0.001 | 0.009 | Co-occurrence |
| CCT3    | TARBP1  | 189 | 26 | 23 | 18 | 1.739 | <0.001 | 0.01  | Co-occurrence |
| SSR2    | TARBP1  | 189 | 26 | 23 | 18 | 1.739 | <0.001 | 0.01  | Co-occurrence |
| NUF2    | SIPA1L2 | 192 | 25 | 22 | 17 | 1.781 | <0.001 | 0.01  | Co-occurrence |
| RGS5    | SIPA1L2 | 192 | 25 | 22 | 17 | 1.781 | <0.001 | 0.01  | Co-occurrence |
| GBA     | ACBD3   | 194 | 29 | 17 | 16 | 1.84  | <0.001 | 0.011 | Co-occurrence |
| GBAP1   | ACBD3   | 194 | 29 | 17 | 16 | 1.84  | <0.001 | 0.011 | Co-occurrence |
| PEA15   | ACBD3   | 194 | 29 | 17 | 16 | 1.84  | <0.001 | 0.011 | Co-occurrence |
| TAGLN2  | ACBD3   | 194 | 29 | 17 | 16 | 1.84  | <0.001 | 0.011 | Co-occurrence |
| CHD1L   | GNPAT   | 195 | 22 | 23 | 16 | 1.819 | <0.001 | 0.012 | Co-occurrence |
| UBAP2L  | TTC13   | 188 | 28 | 22 | 18 | 1.704 | <0.001 | 0.014 | Co-occurrence |
| GBA     | TARBP1  | 188 | 27 | 23 | 18 | 1.695 | <0.001 | 0.015 | Co-occurrence |
| GBAP1   | TARBP1  | 188 | 27 | 23 | 18 | 1.695 | <0.001 | 0.015 | Co-occurrence |
| PEA15   | TARBP1  | 188 | 27 | 23 | 18 | 1.695 | <0.001 | 0.015 | Co-occurrence |
| TAGLN2  | TARBP1  | 188 | 27 | 23 | 18 | 1.695 | <0.001 | 0.015 | Co-occurrence |
| CHD1L   | TTC13   | 194 | 22 | 24 | 16 | 1.771 | <0.001 | 0.018 | Co-occurrence |
| ILF2    | GNPAT   | 187 | 30 | 21 | 18 | 1.676 | <0.001 | 0.018 | Co-occurrence |
| UBAP2L  | TARBP1  | 187 | 28 | 23 | 18 | 1.654 | <0.001 | 0.022 | Co-occurrence |
| CCT3    | SIPA1L2 | 190 | 27 | 22 | 17 | 1.693 | <0.001 | 0.023 | Co-occurrence |
| COPA    | SIPA1L2 | 190 | 27 | 22 | 17 | 1.693 | <0.001 | 0.023 | Co-occurrence |
| NCSTN   | SIPA1L2 | 190 | 27 | 22 | 17 | 1.693 | <0.001 | 0.023 | Co-occurrence |
| SSR2    | SIPA1L2 | 190 | 27 | 22 | 17 | 1.693 | <0.001 | 0.023 | Co-occurrence |
| NUF2    | TARBP1  | 190 | 25 | 24 | 17 | 1.683 | <0.001 | 0.024 | Co-occurrence |
| RGS5    | TARBP1  | 190 | 25 | 24 | 17 | 1.683 | <0.001 | 0.024 | Co-occurrence |
| ILF2    | TTC13   | 186 | 30 | 22 | 18 | 1.624 | <0.001 | 0.029 | Co-occurrence |
| GBA     | SIPA1L2 | 189 | 28 | 22 | 17 | 1.652 | <0.001 | 0.033 | Co-occurrence |
| GBAP1   | SIPA1L2 | 189 | 28 | 22 | 17 | 1.652 | <0.001 | 0.033 | Co-occurrence |
| S100A10 | IDI1    | 182 | 32 | 23 | 19 | 1.547 | <0.001 | 0.041 | Co-occurrence |
| ILF2    | TARBP1  | 185 | 30 | 23 | 18 | 1.574 | <0.001 | 0.045 | Co-occurrence |

|       |       |     |    |    |    |       |        |       |               |
|-------|-------|-----|----|----|----|-------|--------|-------|---------------|
| COPA  | ACBD3 | 194 | 29 | 18 | 15 | 1.718 | <0.001 | 0.047 | Co-occurrence |
| NCSTN | ACBD3 | 194 | 29 | 18 | 15 | 1.718 | <0.001 | 0.047 | Co-occurrence |

---
